# Supplementary material for: Modifiable Arousal in Attention-Deficit/Hyperactivity Disorder and Its Etiological Association With Fluctuating Reaction Times
Source: PubMed Central journal article supplement (PMC5094448; doi:10.1016/j.bpsc.2016.06.003), 2016-11
Supplement: mmc1.pdf [file mmc1.pdf]

## Modifiable Arousal in Attention-Deficit/Hyperactivity Disorder and Its Etiological Association With Fluctuating Reaction Times

### *Supplemental Information*

**Table S1.** Means and group differences in SCL and SCR amplitude between 3 four-minute segments of baseline condition and the fast-incentive condition (controls = 144, ADHD = 73). Baseline 1: 0-3.59 mins, Baseline 2: 4-7.59 mins, Baseline 3: 8-11.59 mins. Fast-incentive condition: 0-4 minutes.

|                      | Control | ADHD probands | Group comparisons |          |
|----------------------|---------|---------------|-------------------|----------|
|                      | Mean    | Mean          | <i>t</i>          | <i>p</i> |
| <i>SCL</i>           |         |               |                   |          |
| Baseline 1           | 1.86    | 1.56          | 2.41              | 0.01*    |
| Baseline 2           | 1.83    | 1.52          | 1.99              | 0.03*    |
| Baseline 3           | 1.79    | 1.51          | 2.10              | 0.03*    |
| Fast-incentive       | 3.20    | 3.70          | 1.10              | 0.27     |
| <i>SCR amplitude</i> |         |               |                   |          |
| Baseline 1           | 0.41    | 0.40          | 0.25              | 0.40     |
| Baseline 2           | 0.37    | 0.37          | 1.21              | 0.20     |
| Baseline 3           | 0.39    | 0.41          | 0.52              | 0.60     |
| Fast-incentive       | 0.34    | 0.32          | 0.07              | 0.91     |

Skin conductance level (SCL), skin conductance response (SCR) amplitude. Group means of transformed data and subsequent group comparison tests are listed. \* $p < 0.05$ .

**Table S2.** Main effect of group (ADHD vs control), condition (segment of baseline condition vs the fast-incentive condition), and group x condition interaction, controlling for age (controls = 144, ADHD = 73). Baseline 1: 0-3.59 mins, Baseline 2: 4-7.59 mins, Baseline 3: 8-11.59 mins. Fast–incentive condition: 0-4 minutes.

| <b>Condition</b>             | <b>Main effects</b> | <b><i>t</i></b> | <b><i>p</i></b> |
|------------------------------|---------------------|-----------------|-----------------|
| <i>SCL</i>                   |                     |                 |                 |
| Baseline 1 vs fast-incentive | group               | 1.37            | 0.17            |
|                              | condition           | 4.58            | 0.01            |
|                              | group x condition   | 2.48            | 0.01            |
| Baseline 2 vs fast-incentive | group               | 1.22            | 0.22            |
|                              | condition           | 4.59            | 0.01            |
|                              | group x condition   | 2.21            | 0.04            |
| Baseline 3 vs fast-incentive | group               | 1.55            | 0.12            |
|                              | condition           | 2.10            | 0.03            |
|                              | group x condition   | 2.03            | 0.04            |
| <i>SCR amplitude</i>         |                     |                 |                 |
| Baseline 1 vs fast-incentive | group               | 1.39            | 0.16            |
|                              | condition           | 0.81            | 0.42            |
|                              | group x condition   | 0.75            | 0.45            |
| Baseline 2 vs fast-incentive | group               | 0.95            | 0.34            |
|                              | condition           | 0.52            | 0.61            |
|                              | group x condition   | 0.45            | 0.34            |
| Baseline 3 vs fast-incentive | group               | 0.78            | 0.30            |
|                              | condition           | 0.55            | 0.56            |
|                              | group x condition   | 0.69            | 0.49            |

Skin conductance level (SCL), skin conductance response (SCR) amplitude.

**Table S3.** Means and group differences in SCL and SCR amplitude between unmedicated and medicated ADHD participants in the baseline condition and the fast-incentive condition (unmedicated = 35, medicated = 38), controlling for age.

|                | <b>Unmedicated<br/>ADHD</b> | <b>Medicated<br/>ADHD</b> | <b>Group comparisons</b> |          |
|----------------|-----------------------------|---------------------------|--------------------------|----------|
|                | Mean (SD)                   | Mean (SD)                 | <i>t</i>                 | <i>p</i> |
| <i>SCL</i>     |                             |                           |                          |          |
| Baseline       | 1.66 (0.40)                 | 1.56 (0.38)               | 0.67                     | 0.50     |
| Fast-incentive | 5.27 (1.54)                 | 5.49 (2.01)               | 0.76                     | 0.45     |
| <i>SCR</i>     |                             |                           |                          |          |
| Baseline       | -0.94 (0.49)                | -0.83 (0.59)              | -0.68                    | 0.49     |
| Fast-incentive | -1.32 (0.65)                | -1.26 (0.76)              | 0.06                     | 0.95     |

Note: raw scores are reported. Skin conductance level (SCL), skin conductance response (SCR) amplitude.

**Table S4.** Main effect of group (ADHD vs control), condition (whole baseline condition vs fast-incentive condition), and group x condition interactions, controlling for age and stimulant medication use (controls = 144, ADHD = 73).

| <b>Main effect</b>   | <b><i>t</i></b> | <b><i>p</i></b> |
|----------------------|-----------------|-----------------|
| <i>SCL</i>           |                 |                 |
| Group                | 0.10            | 0.91            |
| Condition            | 29.94           | <0.01           |
| Group x condition    | 2.55            | 0.01            |
| <i>SCR amplitude</i> |                 |                 |
| Group                | 0.21            | 0.84            |
| Condition            | 0.37            | 0.71            |
| Group x condition    | 0.71            | 0.48            |

Skin conductance level (SCL), skin conductance response (SCR) amplitude.

**Table S5.** Main effect of group (ADHD vs control), condition (whole baseline condition vs fast-incentive condition), and group x condition interactions in an un-medicated sample (controls = 144, ADHD = 35), controlling for age.

| <b>Main effect</b>   | <b><i>t</i></b> | <b><i>p</i></b> |
|----------------------|-----------------|-----------------|
| <i>SCL</i>           |                 |                 |
| Group                | 1.47            | 0.14            |
| Condition            | 20.88           | <0.01           |
| Group x condition    | 2.24            | 0.01            |
| <i>SCR amplitude</i> |                 |                 |
| Group                | 0.07            | 0.94            |
| Condition            | 0.25            | 0.80            |
| Group x condition    | 0.98            | 0.33            |

Skin conductance level (SCL), skin conductance response (SCR) amplitude.

**Table S6.** Main effect of group (ADHD vs control), condition (whole baseline condition vs fast-incentive condition), and group x condition interactions controlling for age, and anxiety, and depression scores (controls = 144, ADHD = 73). Anxiety and depression scores are taken from the Clinical Interview Schedule-Revised (CIS-R).

| <b>Covariates</b> | <b>ADHD mean (SD)</b> | <b>Control Mean (SD)</b> | <b><i>t</i></b> | <b><i>p</i></b> |
|-------------------|-----------------------|--------------------------|-----------------|-----------------|
| <i>Anxiety</i>    | 0.45 (0.93)           | 0.19 (0.54)              | 2.00            | 0.05            |
| <i>Depression</i> | 0.31 (0.80)           | 0.22 (0.56)              | 0.73            | 0.47            |

| <b>Covariates</b>               | <b>Main effect</b>   | <b><i>t</i></b> | <b><i>p</i></b> |
|---------------------------------|----------------------|-----------------|-----------------|
| <i>Age and anxiety score</i>    |                      |                 |                 |
|                                 | <i>SCL</i>           |                 |                 |
|                                 | Group                | 0.58            | 0.56            |
|                                 | Condition            | 23.63           | <0.01           |
|                                 | Group x condition    | 2.47            | 0.01            |
|                                 | <i>SCR amplitude</i> |                 |                 |
|                                 | Group                | 1.35            | 0.14            |
|                                 | Condition            | 0.87            | 0.49            |
|                                 | Group x condition    | 0.78            | 0.48            |
| <i>Age and depression score</i> |                      |                 |                 |
|                                 | <i>SCL</i>           |                 |                 |
|                                 | Group                | 0.58            | 0.56            |
|                                 | Condition            | 23.63           | <0.01           |
|                                 | Group x condition    | 2.47            | 0.01            |
|                                 | <i>SCR amplitude</i> |                 |                 |
|                                 | Group                | 1.31            | 0.19            |
|                                 | Condition            | 0.88            | 0.41            |
|                                 | Group x condition    | 0.72            | 0.47            |

Skin conductance level (SCL), skin conductance response (SCR) amplitude.

**Table S7.** Pearson correlations in ADHD and control groups separately, between skin conductance level (SCL), skin conductance response (SCR) amplitude and reaction time variability (RTV), in the baseline and fast-incentive condition.

|                    | <b>SCL</b> | <b>SCR amplitude</b> |
|--------------------|------------|----------------------|
| <i>Control</i>     |            |                      |
| RTV-baseline       | -0.12      | -0.10                |
| RTV-fast-incentive | -0.16      | -0.02                |
| <i>ADHD</i>        |            |                      |
| RTV-baseline       | -0.31**    | -0.09                |
| RTV-fast-incentive | -0.29**    | -0.32                |

\*\*  $p < 0.01$  skin conductance level (SCL), skin conductance response (SCR) amplitude.
